# Supplementary material
Source: publisher figshare collection journal article supplement (https://acs.figshare.com/ndownloader/files/20426313)
Supplement: Supplementary file 1 [file 20426313]

# Supporting Information

## In Situ Tracking Photodegradation of Trace Graphene Oxide by the Online Coupling of Photoinduced Chemical Vapor Generation with a Point Discharge Optical Emission Spectrometer

Zhiqiang Tan,<sup>\*,†</sup> Bowen Wang,<sup>†,‡</sup> Yongguang Yin,<sup>†</sup> Qian Liu,<sup>†</sup> Xia Li,<sup>‡</sup> and Jingfu Liu<sup>†</sup>

<sup>†</sup>*State Key Laboratory of Environmental Chemistry and Ecotoxicology, Research Center for Eco-Environmental Sciences, Chinese Academy of Sciences, 100085 Beijing, P. R. China*

<sup>‡</sup>*School of Environmental Science, Liaoning University, 110036 Shenyang, P. R. China*

\*Corresponding authors: Phone: +86 10 62844175, E-mail: zqtan@rcees.ac.cn

### Table of contents

#### 1. Characterization and Off-line Quantification of GO

#### 2. Effects of Main Degradation Parameters of PI-CVD on Its Photodegradation Efficiency

**Figure S1.** Calibration curve established by the proposed PI-CVG-PD-OES system.

**Figure S2.** Effects of (A) TiO<sub>2</sub> NP concentration and (B) H<sub>2</sub>O<sub>2</sub> concentration on the photodegradation efficiency of PI-CVG.

**Figure S3.** Effects of (A) flow rate of Ar gas as working gas and (B) discharge voltage on the sensitivity and stability of PD-OES.

**Figure S4.** Zeta potentials of GO as a function of pH.

**Figure S5.** Photographs illustrating the salt-induced aggregation of GO or/and NOM under different pH conditions.

**Figure S6.** Emission spectra of the simulated sunlight irradiation.

### References

## **1. Characterization and Off-line Quantification of GO**

The GO samples for AFM measurements were prepared by depositing GO suspension onto a freshly mica plate and drying in air. AFM measurements were carried out using a Multimode 8 with a Nanoscope V controller (Bruker, CA). The concentrations of the NOM stock solution and GO in the stock solution and pristine or fractioned self-prepared colloids were directly quantified using a TOC analyzer (TOC-L, Shimadzu, Japan). Zeta potential measurements were performed on a Malvern Zetasizer (Nano ZS ZEN3600, Malvern, UK). The instrumental parameters above were referred to the instructions of manufacturers.

## **2. Effects of Main Degradation Parameters of PI-CVD on Its Photodegradation Efficiency**

Figure S2B shows that the emission intensity remarkably increases with H<sub>2</sub>O<sub>2</sub> concentration from 50 to 200 mM and then gradually decreases over 200 mM H<sub>2</sub>O<sub>2</sub>. This effect is consistent with the previous study that excessive H<sub>2</sub>O<sub>2</sub> were found to scavenge reactive species such as  $\bullet\text{OH}$ .<sup>1</sup> Therefore, 200 mM H<sub>2</sub>O<sub>2</sub> was chosen for the subsequent experiments.

The effect of reaction time was adjusted by the flow rate of the reactant solution in the range of 0.3–0.7 mL/min. The results show that the emission intensity slightly decreases when the flow rate is higher than 0.4 mL/min (ca. 5.3 min), mainly due to the reduced residence time of GO in the area of the quartz reactor at higher flow rates.<sup>2</sup> Thus, the flow rate of the reactant solution was set as 0.4 mL/min in the following experiments.

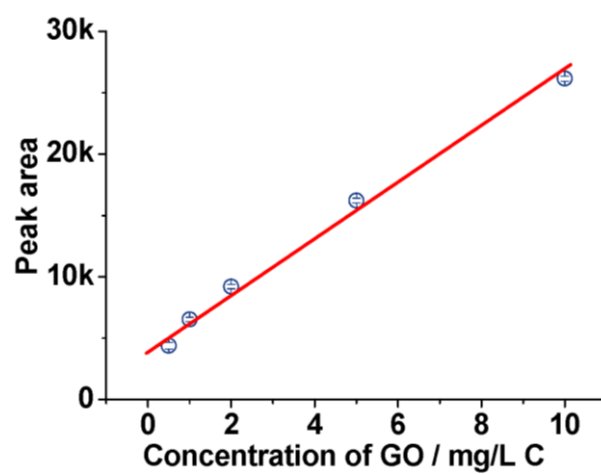

**Figure S1.** Calibration curve established by the proposed PI-CVG-PD-OES system  
(mean  $\pm$  SD, n = 3).

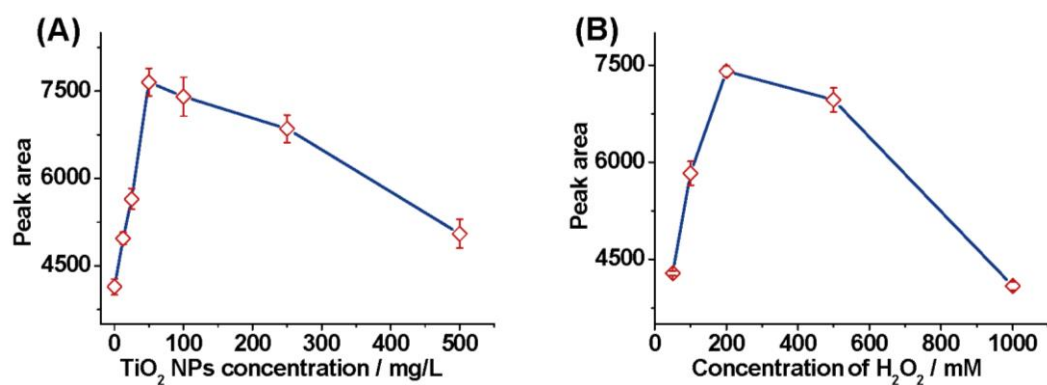

**Figure S2.** Effects of (A)  $\text{TiO}_2$  NP concentration and (B)  $\text{H}_2\text{O}_2$  concentration on the photodegradation efficiency of PI-CVG (mean  $\pm$  SD,  $n = 3$ ).

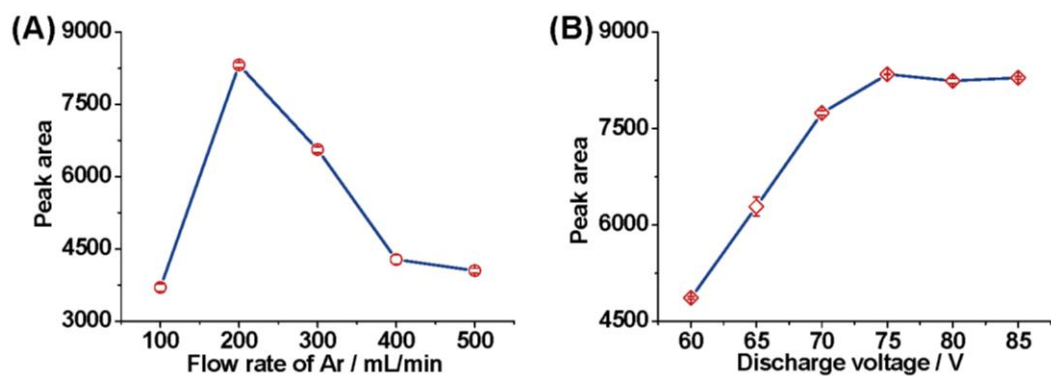

**Figure S3.** Effects of (A) flow rate of Ar gas as working gas and (B) discharge voltage on the sensitivity and stability of PD-OES. (mean  $\pm$  SD,  $n = 3$ ).

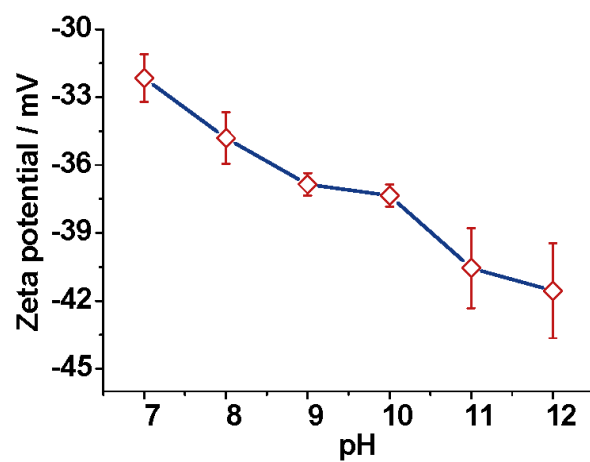

**Figure S4.** Zeta potentials of GO as a function of pH (mean  $\pm$  SD,  $n = 3$ ).

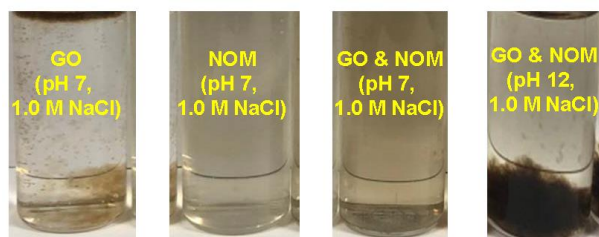

**Figure S5.** Photographs illustrating the salt-induced aggregation of GO or/and NOM under different pH conditions.

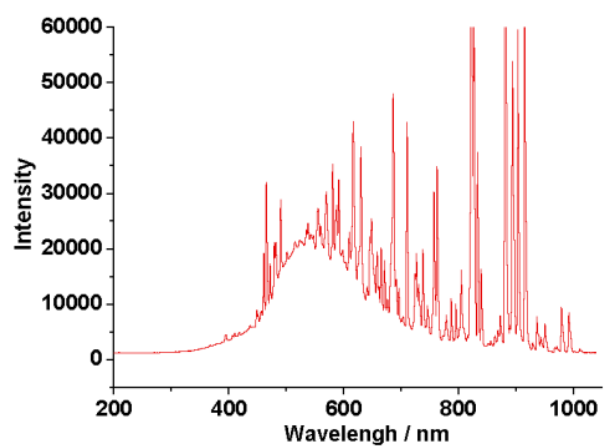

**Figure S6.** Emission spectra of the simulated sunlight irradiation.



## References

1. Zhang, H.; Chen, S.; Zhang, H. G.; Fan, X. F.; Gao, C.; Yu, H. T.; Quan, X. *Front. Environ. Sci. Eng.* **2019**, *13*, 18.
2. Zhang, S.; Tian, Y. F.; Yin, H. L.; Su, Y. B.; Wu, L.; Hou, X. D.; Zheng, C. B. *Environ. Sci. Technol.* **2017**, *51*, 9109–9117.
